# Supplementary material for: How Do Government Guidance Funds Promote Green Innovation?
Source: Research Square preprint supplement (doi:10.21203/rs.3.rs-6968871/v1), 2025-07-22
Supplement: Supplementary file 1 [file 69c18797fbcf47b7a44ad33a.docx]

**Tabel 1. Descriptive Statistics (n=10366)**

| Variable | Mean | Stdev. | Min. | Median | Maximum |
| --- | --- | --- | --- | --- | --- |
| *Gpat* | 0.554 | 0.943 | 0.000 | 0.000 | 4.094 |
| *SF* | 0.032 | 0.175 | 0.000 | 0.000 | 1.000 |
| *Size* | 21.580 | 1.348 | 19.000 | 21.430 | 25.420 |
| *Lev* | 0.410 | 0.179 | 0.075 | 0.402 | 0.835 |
| *ROA* | 0.041 | 0.061 | -0.239 | 0.040 | 0.207 |
| *Indep* | 0.377 | 0.053 | 0.333 | 0.364 | 0.571 |
| *Growth* | 0.187 | 0.369 | -0.444 | 0.123 | 2.217 |
| *Board* | 2.225 | 0.168 | 1.792 | 2.303 | 2.708 |
| *Top1* | 0.327 | 0.137 | 0.094 | 0.305 | 0.697 |

**Table 2. Correlation Coefficient Analysis**

|  | *Gpat* | | *SF* | | *Size* | | *Lev* | | *ROA* | | *Indep* |  | *Growth* | *Board* | *Top1* |
| --- | --- | --- | --- | --- | --- | --- | --- | --- | --- | --- | --- | --- | --- | --- | --- |
| *Gpat* | 1.000 |  |  |  |  |  |  |  |  |  |  |  |  |  |  |
| *SF* | 0.041 | *** | 1.000 |  |  |  |  |  |  |  |  |  |  |  |  |
| *Size* | 0.225 | *** | -0.006 |  | 1.000 |  |  |  |  |  |  |  |  |  |  |
| *Lev* | 0.164 | *** | -0.006 |  | 0.524 | *** | 1.000 |  |  |  |  |  |  |  |  |
| *ROA* | 0.052 | *** | 0.007 |  | 0.087 | *** | -0.296 | *** | 1.000 |  |  |  |  |  |  |
| *Indep* | -0.016 |  | -0.030 | *** | -0.051 | *** | -0.022 | ** | -0.002 |  | 1.000 |  |  |  |  |
| *Growth* | 0.026 | *** | 0.043 | *** | 0.052 | *** | 0.013 |  | 0.270 | *** | -0.017 | * | 1.000 |  |  |
| *Board* | 0.083 | *** | 0.033 | *** | 0.241 | *** | 0.123 | *** | 0.013 |  | -0.606 | *** | -0.011 | 1.000 |  |
| *Top1* | 0.029 | *** | -0.010 |  | 0.175 | *** | 0.058 | *** | 0.121 | *** | 0.058 | *** | -0.006 | -0.014 | 1.000 |
| **Note: ***, **, * indicate significance at the 1%, 5%, and 10% levels, respectively.** | | | | | | | | | | | | | | | |

**Table 3. The Impact of Government Guidance Fund Support on Corporate Green Innovation Levels**

|  | *Gpat* | | *Gpat* | |
| --- | --- | --- | --- | --- |
| (1) | | (2) | |
| *SF* | 0.242 | *** | 0.237 | *** |
| *Size* |  |  | 0.173 | *** |
| *Lev* |  |  | 0.315 | *** |
| *ROA* |  |  | 1.103 | *** |
| *Indep* |  |  | 0.424 | * |
| *Growth* |  |  | -0.110 | *** |
| *Board* |  |  | 0.265 | *** |
| *Top1* |  |  | -0.105 |  |
| *Constant* | 0.118 |  | -4.149 | *** |
| *Ind* | controlled | | controlled | |
| *Year* | controlled | | controlled | |
| n | 10366 | | 10366 | |
| R2 | 0.096 | | 0.171 | |

**Note: The values are corrected for White heteroscedasticity. ***, **, and * indicate significance at the 1%, 5%, and 10% levels, respectively.**

**Table 4 Robustness Tests of the Impact of Government Guidance Fund Support on Corporate Green Innovation Levels**

|  | *Gpat1* | | *Gpat2* | | *Gpat3* | | *Gpat* | |
| --- | --- | --- | --- | --- | --- | --- | --- | --- |
| (1) | | （2） | | （3） | | (4) | |
| *SF* | 0.138 | *** | 0.122 | *** | 0.135 | *** |  |  |
| *SF1* |  |  |  |  |  |  | 0.098 | *** |
| *Size* | 0.346 | *** | 0.180 | *** | 0.115 | *** | 0.173 | *** |
| *Lev* | 0.363 | *** | 0.127 | ** | 0.253 | *** | 0.315 | *** |
| *ROA* | -0.258 |  | 0.667 | *** | 0.522 | *** | 1.102 | *** |
| *Indep* | 0.501 | ** | 0.417 | ** | 0.247 |  | 0.419 | * |
| *Growth* | -0.038 |  | -0.118 | *** | -0.084 | *** | -0.110 | *** |
| *Board* | 0.269 | *** | 0.178 | ** | 0.101 | * | 0.257 | *** |
| *Top1* | -0.216 | *** | -0.181 | *** | -0.013 |  | -0.103 |  |
| *Constant* | -7.594 | *** | -4.128 | *** | -2.672 | *** | -4.152 | *** |
| *Ind* | controlled | | controlled | | controlled | | controlled | |
| *Year* | controlled | | controlled | | controlled | | controlled | |
| n | 10366 | | 10366 | | 10366 | | 10366 | |
| R2 | 0.329 | | 0.149 | | 0.149 | | 0.171 | |

**Note: The values in parentheses are corrected for White heteroscedasticity. ***, **, and * indicate significance at the 1%, 5%, and 10% levels, respectively.**

**Table 5. Post-Propensity Score Matching Regression**

|  | *Gpat1* | |
| --- | --- | --- |
| *(1)* | |
| *SF* | 0.238 | *** |
| *Size* | 0.178 | *** |
| *Lev* | 0.287 | *** |
| *ROA* | 1.061 | *** |
| *Indep* | 0.547 | ** |
| *Growth* | -0.117 | *** |
| *Board* | 0.314 | *** |
| *Top1* | -0.061 |  |
| *Constant* | -4.420 | *** |
| *Ind* | controlled | |
| *Year* | controlled | |
| N | 9847 | |
| R2 | 0.165 | |

**Note: The values in parentheses are t-values corrected for White heteroscedasticity. ***, **, and * indicate significance at the 1%, 5%, and 10% levels, respectively.**

**Table 6. Results of Heckman Two-Stage Test**

|  | *SF* | | *Gpat* | |
| --- | --- | --- | --- | --- |
| (1) | | (2) | |
| *SF* |  |  | 0.230 | *** |
| *Age* | -0.367 | *** |  |  |
| *Size* | 0.001 |  | 0.182 | *** |
| *Lev* | -0.024 |  | 0.319 | *** |
| *ROA* | -0.172 |  | 1.126 | *** |
| *Indep* | -0.590 |  | 0.783 | *** |
| *Growth* | 0.225 | *** | -0.208 | *** |
| *Board* | 0.539 | ** | 0.088 |  |
| *Top1* | -0.161 |  | -0.041 |  |
| *Constant* | -0.940 |  | -3.432 | *** |
| *IMR* |  |  | -0.454 | *** |
| *Ind* | controlled | | controlled | |
| *Year* | controlled | | controlled | |
| n | 9954 | | 9954 | |
| R2 | 0.038 | | 0.166 | |

**Notes: ***, **, * denote significance at 1%, 5%, and 10% levels.**

**Table 7 Analysis of Impact Mechanisms**

|  | *Subsidy* | | *Gpat* | | *Cost* | | *Gpat* | | *R&D* | | *Gpat* | | *Myopia* | | *Gpat* | |
| --- | --- | --- | --- | --- | --- | --- | --- | --- | --- | --- | --- | --- | --- | --- | --- | --- |
| （1） | | （2） | | （3） | | （4） | | （5） | | （6） | | （7） | | （8） | |
| *SF* | 0.130 | ** | 0.226 | *** | -0.002 | *** | 0.222 | *** | 0.444 | * | 0.223 | *** | -0.007 | ** | 0.233 | *** |
| *Subsidy* |  |  | 0.091 | *** |  |  |  |  |  |  |  |  |  |  |  |  |
| *Cost* |  |  |  |  |  |  | -6.597 | *** |  |  |  |  |  |  |  |  |
| *R&D* |  |  |  |  |  |  |  |  |  |  | 0.032 | *** |  |  |  |  |
| *Myopia* |  |  |  |  |  |  |  |  |  |  |  |  |  |  | -0.651 | *** |
| *Size* | 0.686 | *** | 0.110 | *** | -0.000 |  | 0.172 | *** | -0.679 | *** | 0.194 | *** | 0.001 | ** | 0.173 | *** |
| *Lev* | -0.030 |  | 0.318 | *** | 0.022 | *** | 0.463 | *** | -3.753 | *** | 0.436 | *** | -0.002 |  | 0.314 | *** |
| *ROA* | 0.669 | *** | 1.042 | *** | -0.037 | *** | 0.856 | *** | -2.713 | *** | 1.190 | *** | -0.063 | *** | 1.063 | *** |
| *Indep* | 1.169 | *** | 0.317 |  | -0.003 |  | 0.405* |  | 5.912*** |  | 0.234 |  | -0.025* |  | 0.407 | * |
| *Growth* | -0.207 | *** | -0.091*** |  | -0.001 | *** | -0.119 | *** | -0.313 | *** | -0.100 | *** | -0.012 | *** | -0.118 | *** |
| *Board* | 0.252 | *** | 0.242 | *** | -0.002 | *** | 0.249 | *** | 1.093 | *** | 0.230 | *** | 0.007 |  | 0.269 | *** |
| *Top1* | -0.199 | ** | -0.087 |  | -0.011 | *** | -0.181 | *** | -1.262 | *** | -0.064 |  | 0.012 | *** | -0.097 |  |
| *Constant* | 1.153 | *** | -4.255 | *** | 0.033 | *** | -3.934 | *** | 14.467 | *** | -4.613 | *** | 0.036 | ** | -4.126 | *** |
| *Ind* | controlled | | controlled | | controlled | | controlled | | controlled | | controlled | | controlled | | controlled | |
| *Year* | controlled | | controlled | | controlled | | controlled | | controlled | | controlled | | controlled | | controlled | |
| n | 10366 | | 10366 | | 10366 | | 10366 | | 10366 | | 10366 | | 10366 | | 10366 | |
| R2 | 0.449 | | 0.181 | | 0.219 | | 0.178 | | 0.333 | | 0.187 | | 0.064 | | 0.173 | |

**Note: The values are corrected for White heteroscedasticity. ***, **, and * indicate significance at the 1%, 5%, and 10% levels, respectively.**

**Table 8. Heterogeneity Analysis**

|  | Ownership Nature  / Property Rights | | Foreign Institutional Investors | | Media Attention | |
| --- | --- | --- | --- | --- | --- | --- |
|  | (1) | | (2) | | (3) | |
| *SF* | 0.148 | ** | 0.187 | *** | 0.030 |  |
| *Med* | 0.015 |  | 0.047 | ** | 0.001 | *** |
| *SF×Med* | 0.301 | ** | 0.232 | * | 0.002 | *** |
| *Size* | 0.170 | *** | 0.165 | *** | 0.153 | *** |
| *Lev* | 0.311 | *** | 0.332 | *** | 0.301 | *** |
| *ROA* | 1.119 | *** | 1.063 | *** | 1.067 | *** |
| *Indep* | 0.399 | * | 0.407 | * | 0.294 |  |
| *Growth* | -0.107 | *** | -0.106 | *** | -0.124 | *** |
| *Board* | 0.251 | *** | 0.260 | *** | 0.241 | *** |
| *Top1* | -0.116 | * | -0.112 | * | -0.072 |  |
| *Constant* | -4.055 | *** | -3.996 | *** | -3.820 | *** |
| *Ind* | Controlled | | controlled | | controlled | |
| *Year* | controlled | | controlled | | controlled | |
| n | 10366 | | 10366 | | 10366 | |
| R2 | 0.172 | | 0.172 | | 0.180 | |

**Note: The values in parentheses are corrected for White heteroscedasticity. ***, **, and * indicate significance at the 1%, 5%, and 10% levels, respectively.**
